# Supplementary material
Source: publisher site journal article supplement (https://www.dovepress.com/get_supplementary_file.php?f=445616.docx)
Supplement: Supplementary file 1 [file get_supplementary_file.php]

**APPENDIX A**

**PubMed Session Results (07 Mar 2023)**

| Search | Query | Items found |
| --- | --- | --- |
| #4 | #3 NOT ("Animals"[Mesh] NOT "Humans"[Mesh]) | 2,954 |
| #3 | #1 AND #2 | 3,071 |
| #2 | "Abdominal Pain"[Mesh] OR "Chronic Pain"[Mesh] OR "Pain, Postoperative"[Mesh] OR "Pelvic Pain"[Mesh] OR "Visceral Pain"[Mesh] OR "post surgery pain"[tiab] OR "post surgical pain"[tiab] OR "postsurgery pain"[tiab] OR "postsurgical pain"[tiab] OR "post operative pain"[tiab] OR "postoperative pain"[tiab] OR "chronic surgical pain"[tiab] OR "pain after surg*"[tiab] OR "pain after laparoscop*"[tiab] OR "post laparoscopic pain"[tiab] OR "postlaparoscopic pain"[tiab] OR "post laparoscopy pain"[tiab] OR "postlaparoscopy pain"[tiab] OR (("Inflammatory Bowel Diseases"[Mesh] OR "inflammatory bowel"[tiab] OR crohn*[tiab]) AND (pain*[tiab] OR debilitat*[tiab])) OR (("Pelvis"[Mesh] OR pelvi*[tiab]) AND (pain*[tiab] OR debilitat*[tiab])) OR (("Urinary Bladder"[Mesh] OR bladder*[tiab]) AND (pain*[tiab] OR debilitat*[tiab])) OR "Cystitis"[Mesh] OR cystiti*[tiab] OR (viscera*[tiab] AND (pain*[tiab] OR debilitat*[tiab])) OR (("Pancreatitis, Chronic"[Mesh] OR pancrea*[tiab]) AND (pain*[tiab] OR debilitat*[tiab])) OR (("Bariatric Surgery"[Mesh] OR "Laparoscopy"[Mesh] OR laparoscop*[tiab] OR ((surg*[tiab]) AND (abdom*[tiab] OR pelvi*[tiab] OR peritone*[tiab] OR bariatric[tiab] OR "weight reduction*"[tiab] OR obesity[tiab]))) AND (pain*[tiab] OR debilitat*[tiab])) OR (("Colitis"[Mesh] OR "Gastroparesis"[Mesh] OR colitis[tiab] OR gastropares*[tiab] OR gastro-pares*[tiab]) AND (pain*[tiab] OR debilitat*[tiab])) OR (("Endometriosis"[Mesh] OR endometrios*[tiab]) AND (pain*[tiab] OR debilitat*[tiab])) OR (("Prostate"[Mesh] OR "Prostatitis"[Mesh] OR prostat*[tiab]) AND (pain*[tiab] OR debilitat*[tiab])) OR orchialgia[tiab] OR prostatodynia[tiab] | 228,832 |
| #1 | "Implantable Neurostimulators"[Mesh] OR "Electric Stimulation Therapy"[Mesh:NoExp] OR "Spinal Cord Stimulation"[Mesh] OR neuromodulat*[tiab] OR neurostimulat*[tiab] OR neuro-modulat*[tiab] OR neuro-stimulat*[tiab] OR "spinal cord stimulat*"[tiab] OR PNNM[tiab] OR "nerve stimulat*"[tiab] OR "neural stimulat*"[tiab] | 84,932 |

**Embase.com Session Results (07 Mar 2023)**

| Search | Query | Items found |
| --- | --- | --- |
| #5 | #4 NOT ('conference abstract'/it OR 'conference review'/it) | 5,833 |
| #4 | #3 NOT ([animals]/lim NOT [humans]/lim) | 8,470 |
| #3 | #1 AND #2 | 9,012 |
| #2 | 'abdominal pain'/exp OR 'chronic pain'/exp OR 'postoperative pain'/exp OR 'pelvic pain'/exp OR 'visceral pain'/de OR 'post surgery pain':ab,ti,kw OR 'post surgical pain':ab,ti,kw OR 'postsurgery pain':ab,ti,kw OR 'postsurgical pain':ab,ti,kw OR 'post operative pain':ab,ti,kw OR 'postoperative pain':ab,ti,kw OR 'chronic surgical pain':ab,ti,kw OR 'pain after surg*':ab,ti,kw OR 'pain after laparoscop*':ab,ti,kw OR 'post laparoscopic pain':ab,ti,kw OR 'postlaparoscopic pain':ab,ti,kw OR 'post laparoscopy pain':ab,ti,kw OR 'postlaparoscopy pain':ab,ti,kw OR (('inflammatory bowel disease'/exp OR 'inflammatory bowel':ab,ti,kw OR crohn*:ab,ti,kw) AND (pain*:ab,ti,kw OR debilitat*:ab,ti,kw)) OR (('pelvis'/exp OR pelvi*:ab,ti,kw) AND (pain*:ab,ti,kw OR debilitat*:ab,ti,kw)) OR (('bladder'/exp OR bladder*:ab,ti,kw) AND (pain*:ab,ti,kw OR debilitat*:ab,ti,kw)) OR 'cystitis'/exp OR cystiti*:ab,ti,kw OR (viscera*:ab,ti,kw AND (pain*:ab,ti,kw OR debilitat*:ab,ti,kw)) OR (('chronic pancreatitis'/exp OR pancrea*:ab,ti,kw) AND (pain*:ab,ti,kw OR debilitat*:ab,ti,kw)) OR (('bariatric surgery'/exp OR 'laparoscopy'/de OR 'laparoscopic surgery'/exp OR laparoscop*:ab,ti,kw OR ((surg*:ab,ti,kw) AND (abdom*:ab,ti,kw OR pelvi*:ab,ti,kw OR peritone*:ab,ti,kw OR bariatric:ab,ti,kw OR 'weight reduction*':ab,ti,kw OR obesity:ab,ti,kw))) AND (pain*:ab,ti,kw OR debilitat*:ab,ti,kw)) OR (('colitis'/exp OR 'stomach paresis'/exp OR colitis:ab,ti,kw OR gastropares*:ab,ti,kw OR gastro-pares*:ab,ti,kw) AND (pain*:ab,ti,kw OR debilitat*:ab,ti,kw)) OR (('endometriosis'/exp OR endometrios*:ab,ti,kw) AND (pain*:ab,ti,kw OR debilitat*:ab,ti,kw)) OR (('prostate'/exp OR 'prostatitis'/exp OR prostat*:ab,ti,kw) AND (pain*:ab,ti,kw OR debilitat*:ab,ti,kw)) OR 'scrotal pain'/exp OR orchialgia:ab,ti,kw OR prostatodynia:ab,ti,kw | 538,698 |
| #1 | 'implantable neurostimulator'/exp OR 'nerve stimulation'/de OR 'spinal cord stimulation'/exp OR 'neuromodulation'/exp OR neuromodulat*:ab,ti,kw OR neurostimulat*:ab,ti,kw OR 'neuro-modulat*':ab,ti,kw OR 'neuro-stimulat*':ab,ti,kw OR 'spinal cord stimulat*':ab,ti,kw OR PNNM:ab,ti,kw OR 'nerve stimulat*':ab,ti,kw OR 'neural stimulat*':ab,ti,kw | 135,093 |

**Web of Science (Core Collection) Session Results (07 Mar 2023)**

| Search | Query | Items found |
| --- | --- | --- |
| #3 | #1 AND #2 | 2,067 |
| #2 | TS=("post surgery pain" OR "post surgical pain" OR "postsurgery pain" OR "postsurgical pain" OR "post operative pain" OR "postoperative pain" OR "chronic surgical pain" OR "pain after surg*" OR "pain after laparoscop*" OR "post laparoscopic pain" OR "postlaparoscopic pain" OR "post laparoscopy pain" OR "postlaparoscopy pain" OR (("inflammatory bowel" OR "crohn*") AND ("pain*" OR "debilitat*")) OR (("pelvi*") AND ("pain*" OR "debilitat*")) OR (("bladder*") AND ("pain*" OR "debilitat*")) OR "cystiti*" OR ("viscera*" AND ("pain*" OR "debilitat*")) OR (("pancrea*") AND ("pain*" OR "debilitat*")) OR (("laparoscop*" OR (("surg*") AND ("abdom*" OR "pelvi*" OR "peritone*" OR "bariatric" OR "weight reduction*" OR "obesity"))) AND ("pain*" OR "debilitat*")) OR (("colitis" OR "gastropares*" OR "gastro-pares*") AND ("pain*" OR "debilitat*")) OR (("endometrios*") AND ("pain*" OR "debilitat*")) OR (("prostat*") AND ("pain*" OR "debilitat*")) OR "orchialgia" OR "prostatodynia") | 157,728 |
| #1 | TS=("neuromodulat*" OR "neurostimulat*" OR "neuro-modulat*" OR "neuro-stimulat*" OR "spinal cord stimulat*" OR "PNNM" OR "nerve stimulat*" OR "neural stimulat*") | 64,644 |
